# Supplementary material for: Transcriptome Profiling Based at Different Time Points after Hatching Deepened Our Understanding on Larval Growth and Development of Amphioctopus fangsiao
Source: MDPI journal article supplement (doi:10.3390/metabo13080927), 2023-08-08
Supplement: s1 [file s1]

**Table S3.** Continuous up-regulation of DEG expression.

| Gene name<br>(abbreviation) | Gene name<br>(official full name)                      | 0h<br>expression<br>level | 4h<br>expression<br>level | 12h<br>expression<br>level | 24h<br>expression<br>level | Fitting<br>exponential<br>slope |
|-----------------------------|--------------------------------------------------------|---------------------------|---------------------------|----------------------------|----------------------------|---------------------------------|
| <i>GLDC</i>                 | glycine decarboxylase                                  | 3.5833                    | 20.9700                   | 26.9433                    | 30.5867                    | 0.9537                          |
| <i>DUSP14</i>               | dual specificity phosphatase 14                        | 0.0067                    | 6.5133                    | 6.7000                     | 8.2000                     | 0.2650                          |
| <i>DPF2</i>                 | double PHD fingers 2                                   | 0.0000                    | 0.2800                    | 0.7133                     | 1.2067                     | 0.0495                          |
| <i>GNAI1</i>                | G protein subunit alpha i1                             | 0.0000                    | 0.6067                    | 0.6967                     | 1.1167                     | 0.0398                          |
| <i>ZNF271</i>               | zinc finger protein 271                                | 0.0000                    | 0.3467                    | 0.5400                     | 0.5733                     | 0.0209                          |
| <i>ERAP1</i>                | endoplasmic reticulum<br>aminopeptidase 1              | 0.0000                    | 0.2100                    | 0.3100                     | 0.5300                     | 0.0202                          |
| <i>CDH23</i>                | cadherin related 23                                    | 0.0667                    | 0.4433                    | 0.5667                     | 0.6200                     | 0.0193                          |
| <i>FOXJ3</i>                | forkhead box J3                                        | 0.0000                    | 0.2333                    | 0.3733                     | 0.4433                     | 0.0165                          |
| <i>TSNAXIP1</i>             | translin associated factor X<br>interacting protein 1  | 0.0000                    | 0.2467                    | 0.2667                     | 0.4367                     | 0.0154                          |
| <i>TASOR2</i>               | transcription activation<br>suppressor family member 2 | 0.0000                    | 0.3167                    | 0.3400                     | 0.3933                     | 0.0128                          |
| <i>PIAS2</i>                | protein inhibitor of activated<br>STAT 2               | 0.0000                    | 0.0900                    | 0.1000                     | 0.1967                     | 0.0072                          |
| <i>INVS</i>                 | inversin                                               | 0.0033                    | 0.1200                    | 0.1500                     | 0.2033                     | 0.0071                          |
| <i>FBN1</i>                 | fibrillin 1                                            | 0.0000                    | 0.1733                    | 0.1733                     | 0.1933                     | 0.0060                          |
