# Supplementary material for: Transcriptome Profiling Based at Different Time Points after Hatching Deepened Our Understanding on Larval Growth and Development of Amphioctopus fangsiao
Source: MDPI journal article supplement (doi:10.3390/metabo13080927), 2023-08-08
Supplement: s1 [file s1]

**Table S2.** Primer list for quantitative RT-PCR verification.

| Gene name       | Forward primer (5'-3') | TM(°C) | Reverse primer (5'-3') | TM(°C) | Amplicon       |
|-----------------|------------------------|--------|------------------------|--------|----------------|
|                 |                        |        |                        |        | length<br>(bp) |
| <i>ACSM3</i>    | CTACTGCTCTACGCTTGTTT   | 60     | GGCTAATCAGCTCCTCATTC   | 60     | 108            |
| <i>CLTC</i>     | ACATGATAGCCGAGACAGA    | 60     | GGGTGTGATGGGTTCATTAG   | 60     | 117            |
| <i>CYP2B4</i>   | CCTGACGAAACACCAATGA    | 60     | AACACACATCGACGACATAC   | 60     | 111            |
| <i>DPF2</i>     | CTGTGCATCGGACCATT      | 60     | GGTGAAGTCCAGACAAAGAC   | 60     | 103            |
| <i>DUSP14</i>   | GGAAGCCAGAACGAGTAAAG   | 60     | TTCACGCCATCGCTAAAG     | 60     | 133            |
| <i>FOLH1</i>    | CACAGAGAGAGAGAGAGAGAG  | 60     | ACAAGGAATGATGGCTACAG   | 60     | 101            |
| <i>GLDC</i>     | ATCTCCTTCCAACCAACAG    | 60     | CCGAGATAGGGATGAGACATA  | 60     | 118            |
| <i>GNAIL</i>    | GGTAACAAGAGGCGGATTT    | 60     | CTGTTCTGGGTGTGTGTATT   | 60     | 124            |
| <i>MEF2A</i>    | GTGCCTTCCACATCAGTATC   | 60     | TGGCTTGGGATGGTATCT     | 60     | 106            |
| <i>PPP1CB</i>   | TCAGGGTCTGACCAAAGT     | 60     | GGAGGTCTCTCTCCAGATT    | 60     | 110            |
| <i>PPP1R12A</i> | GCCTTCAACCCTGAACTATG   | 60     | GCAGTTGAAGCCTCTCTATG   | 60     | 101            |
| <i>TJP1</i>     | GCCGGAATCTAAACGTACTC   | 60     | ATGGGTCTCCACGTAAT      | 60     | 115            |
| <i>ZNF271</i>   | CACCTGTGTGAGTACGTTTATG | 61     | AAGAGGAGTAGAAAGCAGAGG  | 61     | 100            |
