# Supplementary material for: Transcriptome Profiling Based at Different Time Points after Hatching Deepened Our Understanding on Larval Growth and Development of Amphioctopus fangsiao
Source: MDPI journal article supplement (doi:10.3390/metabo13080927), 2023-08-08
Supplement: s1 [file s1]

**Table S4.** Network statistics of PPI network.

| Network statistics       |       |
|--------------------------|-------|
| Number of nodes          | 75    |
| Number of edges          | 110   |
| Average node degree      | 2.930 |
| Clustering coefficient   | 0.352 |
| Expected number of edges | 101   |

Number of nodes: the numbers of interacting proteins.

Number of edges: the numbers of connections between proteins in the network.

Average node degree: mean value of protein interaction numbers at all nodes.

Clustering coefficient: all nodes average clustering coefficient. A single node clustering coefficient is the ratio of the actual connection numbers of its neighbors to the theoretical maximum connection numbers.

Expected number of edges: expected value of the total number of interactions between proteins in the network.
