# Supplementary material for: Transcriptome Profiling Based at Different Time Points after Hatching Deepened Our Understanding on Larval Growth and Development of Amphioctopus fangsiao
Source: MDPI journal article supplement (doi:10.3390/metabo13080927), 2023-08-08
Supplement: s1 [file s1]

**Table S1.** Summary of sequencing results.

| Sample   | Raw reads  | Clean reads | Clean reads Q30 (%) | Clean reads Q20 (%) |
|----------|------------|-------------|---------------------|---------------------|
| Oo-C-1   | 50,581,378 | 49,165,388  | 97.54               | 93.27               |
| Oo-C-2   | 49,281,546 | 46,846,720  | 97.42               | 93.07               |
| Oo-C-3   | 55,727,122 | 53,007,342  | 97.39               | 92.94               |
| Oo-4h-1  | 43,683,716 | 40,502,546  | 97.38               | 92.93               |
| Oo-4h-2  | 50,981,374 | 47,814,924  | 97.47               | 93.15               |
| Oo-4h-3  | 44,781,414 | 41,833,784  | 97.30               | 92.78               |
| Oo-12h-1 | 42,605,216 | 40,522,842  | 97.72               | 93.70               |
| Oo-12h-2 | 54,564,714 | 51,170,578  | 97.30               | 92.72               |
| Oo-12h-3 | 56,997,500 | 53,933,392  | 97.61               | 93.42               |
| Oo-24h-1 | 51,418,618 | 49,235,968  | 97.71               | 93.67               |
| Oo-24h-2 | 60,787,322 | 58,211,806  | 97.52               | 93.20               |
| Oo-24h-3 | 63,795,232 | 61,219,086  | 97.57               | 93.32               |
